# Supplementary material for: Mapping Epitopes Recognised by Autoantibodies Shows Potential for the Diagnosis of High-Grade Serous Ovarian Cancer and Monitoring Response to Therapy for This Malignancy
Source: MDPI journal article supplement (doi:10.3390/cancers13164201), 2021-08-20
Supplement: s1 [file s1]

Article

# Mapping Epitopes Recognised by Autoantibodies Shows Potential for the Diagnosis of High-Grade Serous Ovarian Cancer and Monitoring Response to Therapy for This Malignancy

Rhiane Moody <sup>1</sup>, Kirsty Wilson <sup>1</sup>, Nirmala Chandraleka Kampan <sup>2</sup>, Orla M. McNally <sup>3</sup>, Thomas W. Jobling <sup>4</sup>, Anthony Jaworowski <sup>1</sup>, Andrew N. Stephens <sup>5,6</sup> and Magdalena Plebanski <sup>1,\*</sup>

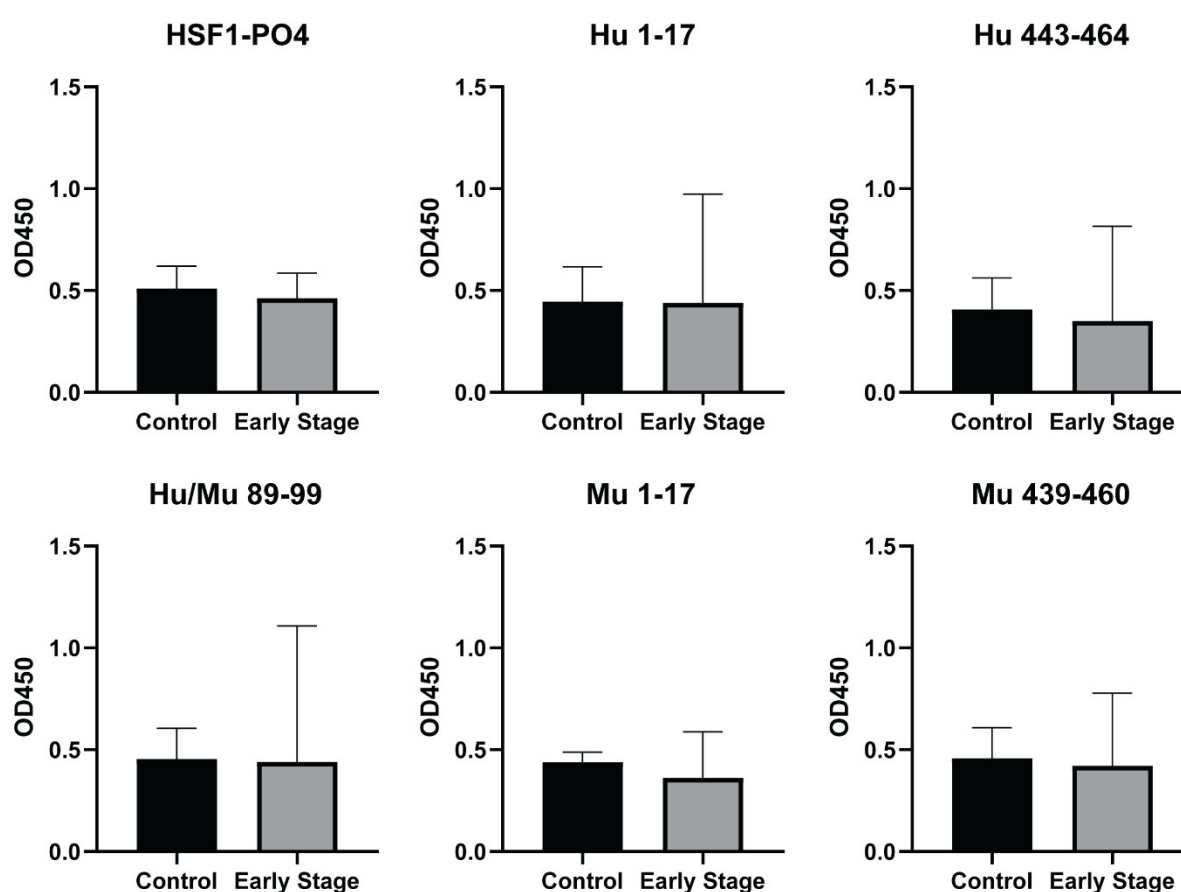

**Figure S1.** Cohort 1 IgA specific antibodies to HSF1-PO4 and the individual selected epitopes, were measured by indirect ELISA. Plasma samples (diluted 1:20) from control samples (n=10) and early stage HGSOc patients (n=7), were analysed in duplicate. Data presented as median with IQR and significance tested using Mann-Whitney U test.
